# Supplementary material
Source: Elsevier journal article supplement (https://www.sciencedirect.com/science/article/pii/S1166708713001553)
Supplement: mmc1 [file mmc1.doc]

| **Niveau de preuve scientifique de l’étude** | **Force de la recommandation** |
| --- | --- |
| *Niveau 1* | |
| Essai comparatif randomisé de grande puissance (risques α et β faibles) | Grade A |
| Méta-analyse |
|  | |
| *Niveau 2* | |
| Essai comparatif randomisé de faible puissance (risques α et β faibles) | Grade B |
|  | |
| *Niveau 3* | Grade C |
| Essai comparatif contemporain non randomisé |
| Étude de cohorte |
|  |
| *Niveau 4* |
| Essai comparatif avec une série historique |
|  |
| *Niveau 5* |
| Série de cas |

***Tableau 1 : Algorithme de traitement.***
